1 **The cellular response towards lanthanum is substrate specific and**  
2 **reveals a novel route for glycerol metabolism in *Pseudomonas putida***  
3 **KT2440**

4 Matthias Wehrmann<sup>a</sup>, Maxime Toussaint<sup>b,c</sup>, Jens Pfannstiel<sup>d</sup>, Patrick Billard<sup>b,c#</sup>, Janosch  
5 Klebensberger<sup>a#</sup>

6  
7 <sup>a</sup>*University of Stuttgart, Institute of Biochemistry and Technical Biochemistry, Department of*  
8 *Technical Biochemistry, Stuttgart, Germany*

9  
10 <sup>b</sup>*Université de Lorraine, LIEC UMR7360, Faculté des Sciences et Technologies, Vandoeuvre-lès-*  
11 *Nancy, France*

12  
13 <sup>c</sup>*CNRS, LIEC UMR7360, Faculté des Sciences et Technologies, Vandoeuvre-lès-Nancy, France*

14  
15 <sup>d</sup>*Core Facility Hohenheim, Mass Spectrometry Module, University of Hohenheim, August von*  
16 *Hartmann-Str. 3, 70599 Stuttgart, Germany*

17  
18 Running title: Conditional responses of *Pseudomonas putida* towards rare earth elements

19  
20 #Address correspondence to Janosch Klebensberger ([janosch.klebensberger@itb.uni-](mailto:janosch.klebensberger@itb.uni-stuttgart.de)  
21 [stuttgart.de](mailto:janosch.klebensberger@itb.uni-stuttgart.de)) and Patrick Billard ([patrick.billard@univ-lorraine.fr](mailto:patrick.billard@univ-lorraine.fr))

22  
23 Keywords: Lanthanides, rare earth elements, proteome, glycerol metabolism, *Pseudomonas*  
24 *putida*, PQQ, PedE, PedH, GarK, dehydrogenases

## 25 **Abstract**

26 Ever since the discovery of the first rare earth element (REE)-dependent enzyme, the physiological role  
27 of lanthanides has become an emerging field of research due to the potential environmental  
28 implications and biotechnological opportunities. In *Pseudomonas putida* KT2440, the two  
29 pyrroloquinoline quinone-dependent alcohol dehydrogenases (PQQ-ADHs) PedE and PedH are  
30 inversely produced in response to La<sup>3+</sup>-availability. This REE-switch is orchestrated by a complex  
31 regulatory network including the PedR2/PedS2 two-component system and is important for efficient  
32 growth on several alcoholic volatiles. As *P. putida* is exposed to a broad variety of organic compounds  
33 in its natural soil habitat, the cellular responses towards La<sup>3+</sup> during growth on various carbon and  
34 energy sources were investigated with a differential proteomic approach. Apart from the Ca<sup>2+</sup>-  
35 dependent enzyme PedE, the differential abundance of most other identified proteins was conditional  
36 and revealed a substrate specificity. Concomitant with the proteomic changes, La<sup>3+</sup> had a beneficial  
37 effect on lag-phases while causing reduced growth rates and lower optical densities in stationary phase  
38 during growth on glycerol. When these growth phenotypes were evaluated with mutant strains, a  
39 novel metabolic route for glycerol utilization was identified that seems to be functional in parallel with  
40 the main degradation pathway encoded by the *glpFKRD* operon. The newly discovered route is  
41 initiated by PedE and/or PedH, which most likely convert glycerol to glyceraldehyde. In the presence  
42 of lanthanum, glyceraldehyde seems to be further oxidized to glycerate, which, upon phosphorylation  
43 to glycerate-2-phosphate by the glycerate kinase GarK, is finally channelled into the central  
44 metabolism.

## 45 **Importance**

46 The biological role of rare earth elements has long been underestimated and research has mainly  
47 focused on methanotrophic bacteria. We have recently demonstrated that *P. putida*, a plant growth  
48 promoting bacterium that thrives in the rhizosphere of various feed crops, possesses a REE-dependent  
49 alcohol dehydrogenase (PedH), but knowledge about lanthanide-dependent effects on physiological  
50 traits in non-methylotrophic bacteria is still scarce. This study demonstrates that the cellular response  
51 of *P. putida* KT2440 towards  $\text{La}^{3+}$  is mostly substrate specific and that during growth on glycerol,  $\text{La}^{3+}$   
52 has a severe effect on growth parameters. We provide compelling evidence that the observed  
53 physiological changes are linked to the catalytic activity of PedH and thereby identify a novel route for  
54 glycerol metabolism in this biotechnological relevant organism. Overall, these findings demonstrate  
55 that lanthanides can alter important physiological traits of non-methylotrophic bacteria, which might  
56 consequently influence their competitiveness during colonization of various environmental niches.

## 57 Introduction

58 The rhizosphere, defined as the narrow region of soil surrounding plant roots, is one of the most  
59 complex ecosystems on earth containing a multitude of organisms from different taxa including fungi,  
60 oomycetes, nematodes, protozoa, algae, viruses, archaea and arthropods as well as up to  $10^8$  soil  
61 dwelling bacteria per gram of fresh root (1–3). Its diversity is mainly shaped by root exudates, a  
62 complex mixture of organic compounds including carbohydrates, amino acids, or carbon acids (4, 5)  
63 and plant-, fungal-, and bacteria-derived volatiles (VOCs) such as alkenes, alcohols, terpenes or  
64 benzenoids (6, 7). As such, it is not surprising that the soil-dwelling organism *P. putida* KT2440 is  
65 equipped with a broad diversity of metabolic pathways in order to maximize its cellular fitness in  
66 different environmental niches including the rhizosphere (8–10). For efficient growth on various  
67 alcoholic VOC substrates, it uses a periplasmic oxidation system consisting of the pyrroloquinoline  
68 quinone-dependent alcohol dehydrogenases (PQQ-ADHs) PedE and PedH (11, 12). The enzymes  
69 appear to be functionally redundant but differ in their metal cofactor dependency. PedE is a  $\text{Ca}^{2+}$ -  
70 dependent enzyme, whereas PedH requires the presence of rare earth elements (REEs) of the  
71 lanthanide series ( $\text{Ln}^{3+}$ ) for catalytic activity (12, 13).

72 Although being among the most ubiquitous metals in the earth's crust, REEs were long considered to  
73 be of no biological relevance due to their low solubility under environmental conditions (14). Indeed,  
74 the only known and characterized REE-dependent enzymes thus far belong to the family of PQQ-ADHs  
75 of methano- and methylotrophic bacteria as well as the non-methylotrophic organism *P. putida*  
76 KT2440 (12, 15–20). A characteristic aspartic acid that is additionally present in the metal coordination  
77 sphere of these enzymes is associated with  $\text{Ln}^{3+}$ -binding. Notably, this specific amino acid residue has  
78 been found in the genome of many bacteria from various origins indicating a broad distribution of  $\text{Ln}^{3+}$ -  
79 dependent enzymes (21–25). Very recently, another  $\text{Ln}^{3+}$ -binding protein, called lanmodulin, was  
80 identified in *M. extorquens* AM1 (26). This periplasmic protein, which shows structural similarities with  
81 the  $\text{Ca}^{2+}$ -binding protein calmodulin, is able to bind up to four  $\text{Ln}^{3+}$  ions per protein with picomolar  
82 affinity and changes its conformation from a largely disordered to a compact, ordered state upon REE

83 binding. Although its exact cellular role has yet to be established, it has been speculated to play a role  
84 in  $\text{Ln}^{3+}$ -uptake. Further, homologous genes have only been identified in the genome of some other  
85 species of *Methylobacteria* and *Bradyrhizobia*.

86 In addition to their functional role as metal cofactor, several studies have recently investigated the  
87 effect of REEs on cellular physiology in different methano- and methylotrophic organisms (20, 27–32).  
88 Some of these studies found different physiological traits to be influenced in response to  $\text{Ln}^{3+}$ -  
89 availability including changes in metabolite cross-feeding, growth rates and -yields, or biofilm  
90 formation. It is further interesting to note that REEs have been used as micro-fertilizers, especially in  
91 China, for over 30 years, as  $\text{Ln}^{3+}$ -supplementation can be associated with increased growth of different  
92 food crops including rice, mungbean, maize, and coconut plants (33–37).

93 The aforementioned results suggest that apart from the inverse transcriptional regulation of PQQ-  
94 ADHs, which has been described in detail for different organisms including *P. putida* (12, 19, 27, 38–  
95 42), additional responses towards REEs exist and could depend on the specific organism and/or  
96 environmental context. To investigate the existence of such conditional cellular responses in the non-  
97 methylotrophic organism *P. putida* KT2440, we used a differential proteomic approach during growth  
98 on various carbon and energy sources that reflect the metabolic diversity of the rhizosphere. From  
99 these experiments, we found that the  $\text{Ca}^{2+}$ -dependent PQQ-ADH PedE was the only protein showing a  
100 differential abundance during growth on all carbon and energy sources tested. The vast majority of  
101 identified proteins were differentially abundant only under one specific growth condition. During  
102 growth on glycerol and 2-phenylethanol, which both represent substrates for PedE and PedH, a  
103 disproportionately high number of metabolism related proteins were more abundant in the presence of  
104  $\text{La}^{3+}$ , while this was not the case during growth on citrate and glucose, carbon and energy sources that  
105 do not represent substrates for the two PQQ-ADHs. In addition, physiological characteristics, such as  
106 growth rates and the lag-phase, of cultures could be linked to the differential activity pattern of PedE  
107 and PedH during growth on glycerol. Based on these results, we were able to identify and reconstruct  
108 a novel metabolic route for glycerol utilisation, which depends on PedE and/or PedH activity. This route  
109 seems to operate in conjunction with the previously described major degradation pathway initiated

110 by the glycerol kinase GlpK and most likely ensures efficient growth of *P. putida* on this polyol  
111 substrate.

## 112 **Materials and Methods**

### 113 *Bacterial strains, plasmids and culture conditions*

114 A complete list of all strains, plasmids, and primers used in this study can be found in **Table S1** and  
115 **Table S2**. All *Pseudomonas putida* and *Escherichia coli* strains were maintained on solidified LB medium  
116 (43). If necessary, 40 µg/mL kanamycin or 20 µg/mL 5-fluorouracil were added for maintenance and/or  
117 selection. For growth, liquid LB medium or a modified M9 salt medium (12) supplemented with 5 mM  
118 2-phenylethanol, 25 mM succinate, 10 mM glucose, 10 mM citrate, 20 mM DL-glycerate, or 20 mM  
119 glycerol as sole source of carbon and energy was used. If not stated otherwise, precultures were grown  
120 overnight in test tubes with 3 ml M9 medium supplemented with succinate at 30°C and 180 rpm. The  
121 next day, cells were washed twice with M9 medium without supplemented C-source, and used to  
122 inoculate 200 µL of M9 medium supplemented with the desired C-source in a 96-well microtiter plate  
123 (Falcon, product no. 353047 or Sarstedt, product no. 83.3924) and incubated at 30°C and 250 rpm in a  
124 microplate reader (Xenius, Safas Monaco) or 28°C and 220 rpm in a rotary shaker (Forma, Thermo  
125 Scientific). Maximum growth rates ( $\mu_{\max}$ ) and lag-times ( $\lambda$ ) were estimated based on fitting the natural  
126 logarithm of the relative OD<sub>600</sub> values ( $\ln(N/N_0)$ , with N being OD<sub>600</sub> at time t) with the Richards growth  
127 model using the “grofit” package in R (44). As OD<sub>600</sub> decreased directly upon begin of the experiment,  
128  $\ln(N/N_{t=3\text{ h}})$  was used instead of  $\ln(N/N_0)$  for better fit. Differences in lag-times, growth rates, and  
129 maximal OD<sub>600</sub> during stationary phase (OD<sub>600</sub><sup>max</sup>) were evaluated by statistical analysis in GraphPad  
130 PRISM using a two-tailed *t*-test ( $\alpha = 0.05$ ,  $n = 3$ ).

131

### 132 *Construction of plasmids*

133 Deletion plasmids pJOE-calA, pJOE-garK, pJOE-glp, and pMW08 were constructed as follows: the 650-  
134 bp to 1000-bp regions upstream and downstream of the *calA* (PP\_2426), *garK* (PP\_3178), *glpFKRD*  
135 (PP\_1076 to PP\_1973), or *glcDEF* (PP\_3745 to PP\_3747) genes were amplified from genomic DNA of *P.*  
136 *putida* KT2440 using primers PcalA1 to PcalA4, PgarK1 to PgarK4, Pglp1 to Pglp4, or MWH03 to MWH06

137 **(Table S2)**. The two up- and downstream fragments and BamHI-digested pJOE6261.2 were then joined  
138 together using one-step isothermal assembly (45).

139

#### 140 *Strain constructions*

141 Deletion mutant strains were constructed as previously described (46). Briefly, the integration vector  
142 pJOE6261.2 harbouring the up- and downstream regions of the target gene(s) was transformed into *P.*  
143 *putida* KT2440  $\Delta upp$  (KT2440\*). Kanamycin (Kan) resistant and 5-fluorouracil (5-FU) sensitive clones  
144 were selected and one of these was incubated in LB medium at 30°C for 24 h. The cell suspension was  
145 then plated on M9 minimal agar plates containing 25 mM succinate and 20  $\mu\text{g ml}^{-1}$  5-FU. Clones that  
146 carried the desired gene deletion were identified by colony PCR of the 5-FU<sup>r</sup> Kan<sup>s</sup> clones using primer  
147 pair PcalA1/PcalA4, PgarK1/PgarK4, Pglp1/Pglp4, or MWH03/MWH06.

148

#### 149 *Protein extraction for comparative proteome analysis*

150 For comparative proteome analysis experiments, 50 ml M9 medium supplemented with citrate,  
151 glucose, glycerol or 2-phenylethanol and 0 or 10  $\mu\text{M}$  LaCl<sub>3</sub> were inoculated with an OD<sub>600</sub> of 0.05 from  
152 succinate precultures of strain *P. putida* KT2440\* in 250 ml polycarbonate Erlenmeyer flasks and  
153 incubated at 30°C and 180 rpm. When cell cultures reached an OD<sub>600</sub> of > 0.4, cells were harvested by  
154 centrifugation for 15 min at 6000 x g and 4°C. Cell pellets were resuspended in 1 ml sample buffer (150  
155 mM Tris-HCl pH 6.8; 2 % SDS; 20 mM dithiothreitol) and heated for 5 min at 95°C with gentle shaking.  
156 Subsequently, samples were centrifuged for 15 min at 21000 x g and 4°C, and the supernatants were  
157 stored in new reaction tubes at -20 °C. In a next step, proteins were precipitated using chloroform-  
158 methanol (47) and pellets were resuspended in Tris-buffered (50 mM, pH 8.5) urea (6 M). Protein  
159 concentrations were determined by the Bradford assay (48).

160

#### 161 *In-solution digest of proteins and peptide purification with C18 Stage Tips*

162 To 25  $\mu\text{g}$  protein in 60  $\mu\text{l}$  Tris-buffered (50 mM, pH 8.5) urea (6 M), DTT was added to a final  
163 concentration of 10 mM to guarantee reduction of cysteines. Samples were incubated for 30 min at



164 56 °C under shaking at 1000 rpm. Alkylation of cysteines was performed by adding 30 mM  
165 iodoacetamide and incubation for 45 min at room temperature in the dark. Alkylation was stopped by  
166 adding 50 mM DTT and samples were incubated for another 10 min at RT. 500 ng LysC protease (Roche)  
167 in 50 mM Tris buffer (pH 8.5) was added and samples were digested overnight at 30 °C. Next, the urea  
168 in the reaction mixture was diluted to 2 M by adding the appropriate amount of Tris buffer (50 mM,  
169 pH 8.5). 1 µg trypsin (Roche) in Tris buffer (50 mM, pH 8.5) was added and digestion was continued for  
170 4 hours at 37 °C. The digest was stopped by addition of 3 µl 10% (v/v) trifluoroacetic acid (TFA). Next,  
171 peptide mixtures were concentrated and desalted on C18 stage tips (49) and dried under vacuum.  
172 Samples were dissolved in 20 µl 0.1% (v/v) TFA. Aliquots of 1 µl were subjected to nanoLC-MS/MS  
173 analysis.

174

#### 175 *Mass spectrometry analysis*

176 NanoLC-ESI-MS/MS experiments were performed on an EASY-nLC 1200 system (Thermo Fisher  
177 Scientific) coupled to a Q-Exactive Plus mass spectrometer (Thermo Fisher Scientific) using an EASY-  
178 Spray nanoelectrospray ion source (Thermo Fisher Scientific). Tryptic peptides were directly injected  
179 to an EASY-Spray analytical column (2 µm, 100 Å PepMapRSLC C18, 25 cm × 75 µm, Thermo Fisher  
180 Scientific) operated at constant temperature of 35 °C. Peptides were separated at a flow rate of 250  
181 nL/min using a 240 min gradient with the following profile: 2% - 10% solvent B in 100 min, 10% - 22%  
182 solvent B in 80 min, 22% - 45% solvent B in 55 min, 45% - 95% solvent B in 5 min and isocratic at 90%  
183 solvent B for 15 min. Solvents used were 0.5 % acetic acid (solvent A) and 0.5% acetic acid in  
184 acetonitrile/H<sub>2</sub>O (80/20, v/v, solvent B). The Q Exactive Plus was operated under the control of  
185 XCalibur 3.0.63 software. MS spectra (m/z = 300-1600) were detected in the Orbitrap at a resolution  
186 of 70000 (m/z = 200) using a maximum injection time (MIT) of 100 ms and an automatic gain control  
187 (AGC) value of 1 x 10<sup>6</sup>. Internal calibration of the Orbitrap analyzer was performed using lock-mass ions  
188 from ambient air as described elsewhere (50). Data dependent MS/MS spectra were generated for the  
189 10 most abundant peptide precursors in the Orbitrap using high energy collision dissociation (HCD)  
190 fragmentation at a resolution of 17500, a normalized collision energy of 27 and an intensity threshold

191 of  $1.3 \times 10^5$ . Only ions with charge states from +2 to +5 were selected for fragmentation using an  
192 isolation width of 1.6 Da. For each MS/MS scan, the AGC was set at  $5 \times 10^5$  and the MIT was 100 ms.  
193 Fragmented precursor ions were dynamically excluded for 30 s within a 5 ppm mass window to avoid  
194 repeated fragmentation.

195

#### 196 *Protein quantification and data analysis*

197 Raw files were imported into MaxQuant (51) version 1.6.0.1 for protein identification and label-free  
198 quantification (LFQ) of proteins. Protein identification in MaxQuant was performed using the database  
199 search engine Andromeda (52). MS spectra and MS/MS spectra were searched against *P. putida*  
200 KT2440 protein sequence database downloaded from UniProt (53). Reversed sequences as decoy  
201 database and common contaminant sequences were added automatically by MaxQuant. Mass  
202 tolerances of 4.5 ppm (parts per million) for MS spectra and 20 ppm for MS/MS spectra were used.  
203 Trypsin was specified as enzyme and two missed cleavages were allowed. Carbamidomethylation of  
204 cysteines was set as a fixed modification and protein N-terminal acetylation and oxidation were  
205 allowed as variable modifications. The 'match between runs' feature of MaxQuant was enabled with  
206 a match time window of one minute and an alignment time window of 20 minutes. Peptide false  
207 discovery rate (FDR) and protein FDR thresholds were set to 0.01.

208 Statistical analysis including *t*-tests and principal component analysis (PCA) were performed using  
209 Perseus software version 1.6.0.2 (54). Matches to contaminant (e.g., keratins, trypsin) and reverse  
210 databases identified by MaxQuant were excluded from further analysis. Proteins were considered for  
211 LFQ (label free quantification) if they were identified by at least two peptides. First, normalized LFQ  
212 values from MaxQuant were log<sub>2</sub> transformed. Missing values were replaced from normal distribution  
213 using a width of 0.2 and a downshift of 2.0. Statistical differences between two sample groups were  
214 determined using an unpaired *t*-test and a *p*-value < 0.01 and a regulation factor > 2 (log<sub>2</sub> fold-change  
215 > 1) were considered as significant change in protein abundance. The mass spectrometry proteomics  
216 data will be deposited to the ProteomeXchange Consortium via the PRIDE (55) partner repository  
217 (submitted).

218

219 *Purification and activity measurement of PQQ-ADHs PedE and PedH*

220 To measure the activity of the two PQQ-ADHs PedE and PedH, the enzymes were expressed in *E. coli*  
221 BL21(DE3) cells using plasmids pMW09 and pMW10, and purified by affinity chromatography as  
222 described elsewhere (12). The activities with the four substrates 2-phenylethanol, citrate, glucose and  
223 glycerol were determined at a concentration of 10 mM using a previously described colorimetric assay  
224 (12) with one minor modification. To represent the growth conditions, 1  $\mu\text{M}$   $\text{La}^{3+}$  instead of 1  $\mu\text{M}$   $\text{Pr}^{3+}$   
225 was used as metal cofactor for PedH.

## 226 Results

227 We have recently demonstrated that the two PQQ-ADHs PedE and PedH are inversely regulated  
228 dependent on the presence of rare earth elements (REEs) and that a complex signalling network, which  
229 includes the activity of the PedR2/PedS2 two-component system, orchestrates this regulation (12, 38).  
230 To identify whether a global cellular response of *P. putida* KT2440 towards REEs beyond the regulation  
231 of the PQQ-ADHs exists, we used a comparative proteomic analysis during growth on four different  
232 carbon and energy sources, namely 2-phenylethanol, glycerol, glucose, and citrate.

233

### 234 *Evaluation of proteomics data*

235 Proteins were extracted from cells of *P. putida* by SDS to enable extraction of cytoplasmic as well as  
236 transmembrane proteins followed by label free nano-LC-MS/MS quantification. In total, 2771 proteins  
237 with at least two unique peptides and an FDR  $\leq$  1% were identified and quantified by our proteomics  
238 approach, corresponding to approximately 50% of the *P. putida* KT2440 proteome. Principal  
239 component analysis revealed high reproducibility for sample replicates and distinct patterns for the  
240 different carbon sources (**Fig. S1**). The majority of proteins was increased or decreased in abundance  
241 in response to the different carbon and energy sources. In contrast, minor differences were observed  
242 in the presence or absence of La<sup>3+</sup> during growth on the same carbon and energy source. Proteins that  
243 exhibited a 2-fold or higher change in abundance between different growth conditions and a *p*-value  
244  $\leq$  0.01 were considered as differentially abundant.

245

### 246 *Effect of lanthanum on protein abundance during growth with different substrates*

247 According to the aforementioned criteria, 56 proteins were identified as differentially abundant  
248 comparing growing cells of *P. putida* in the presence and absence of La<sup>3+</sup> with different carbon sources  
249 (**Fig. 1, Table 3, Table S3-S5**). In these studies, only the Ca<sup>2+</sup>-dependent PQQ-ADH PedE (PP\_2674)  
250 showed a decreased abundance in response to La<sup>3+</sup> during growth on all four different carbon and  
251 energy sources. The Ln<sup>3+</sup>-dependent PQQ-ADH PedH (PP\_2679) showed an increased abundance in

252 response to La<sup>3+</sup> during growth on glucose, glycerol, and 2-phenylethanol, whereas an uncharacterized  
253 pentapeptide repeat containing protein (PP\_2673) that is directly upstream of *pedE* showed a  
254 decreased abundance during growth on glycerol and 2-phenylethanol (**Fig. 1**). The remaining 53  
255 proteins were only identified under one specific growth condition (**Table 3, Table S3-S5**).

256 During growth on 2-phenylethanol and glycerol, a majority of the identified proteins was increased in  
257 abundance (80% and 70%) in response to La<sup>3+</sup> (**Table 3, Table S3**). For glucose and citrate this was  
258 different, as most of the identified proteins were found to be less abundant in response to La<sup>3+</sup> (36%  
259 and 40% during growth on glucose and citrate; **Table S4 and Table S5**). Notably, the majority of the  
260 identified proteins were related to metabolism according to the cluster of orthologous protein groups  
261 (COG) database (56). To test whether the observed conditional proteomic response is linked to PedE  
262 and/or PedH activity, we determined the corresponding enzyme activities with all four carbon and  
263 energy sources (**Table 1**). Apart from the already known substrate 2-phenylethanol, PedE and PedH  
264 also showed activity with glycerol, whereas no activity could be detected with citrate or glucose.

265

#### 266 *Effect of lanthanum during growth on glycerol*

267 From our proteomic- and biochemical data, we speculated that PedE and PedH activity could play a  
268 beneficial role during glycerol metabolism of *P. putida* KT2440. As the degradation pathway and  
269 growth characteristics of this organism have been recently characterized in great detail (57, 58), we  
270 wanted to have a closer look on the effect of La<sup>3+</sup> during growth on this specific carbon and energy  
271 source. In these experiments (**Fig. 2A, Table 2**), we consistently observed a shorter lag-phase ( $\lambda$ ) of the  
272 cultures in response to La<sup>3+</sup>-availability ( $10.2 \pm 0.2$  h vs.  $17.3 \pm 0.2$ ). Additionally, the corresponding  
273 values of the specific growth rates ( $\mu_{\max}$ ,  $0.201 \pm 0.004$  vs.  $0.341 \pm 0.010$  h<sup>-1</sup>) and the maximal OD<sub>600</sub> in  
274 stationary phase (OD<sub>600</sub><sup>max</sup>;  $0.680 \pm 0.014$  vs.  $0.884 \pm 0.004$ ) of the cultures differed in the presence or  
275 absence of La<sup>3+</sup>, respectively. As the purified PedH enzyme showed a 3-fold higher specific activity  
276 towards glycerol compared to PedE *in vitro* ( $0.9 \pm 0.1$  U mg<sup>-1</sup> vs.  $0.3 \pm 0.1$  U mg<sup>-1</sup>; **Table 1**), we  
277 speculated that this increased glycerol conversion by PedH could be the underlying cause for the  
278 observed differences in growth parameters. When subsequently a  $\Delta pedE \Delta pedH$  strain was analysed

279 for growth in the presence and absence of  $\text{La}^{3+}$  (**Fig. 2B, Table 2**), no significant differences in  $\lambda$  and  
280  $\mu_{\text{max}}$  were observed for the  $\Delta\text{pedE} \Delta\text{pedH}$  strain in response to  $\text{La}^{3+}$  while, although less profound, small  
281 differences in  $\text{OD}_{600}^{\text{max}}$  were still detected. Further, under both conditions the double deletion strain  
282 showed a lag-phase that was undistinguishable from that of the parental strain in the absence of  $\text{La}^{3+}$   
283 but dramatically longer than that of the parental strain in the presence of  $\text{La}^{3+}$  ( $17.5 \pm 0.3$  h in the  
284 absence of  $\text{La}^{3+}$  and  $17.2 \pm 0.4$  h in the presence of  $10 \mu\text{M} \text{La}^{3+}$ ). Interestingly, the growth rates under  
285 both conditions ( $0.276 \pm 0.008 \text{ h}^{-1}$  and  $0.291 \pm 0.012 \text{ h}^{-1}$ ) were significantly higher ( $p < 0.01$ ) than those  
286 of the parental strain in presence of  $\text{La}^{3+}$  while still being significantly below ( $p < 0.05$ ) those of the  
287 parental strain in the absence of  $\text{La}^{3+}$ .

288 These results implied that the two PQQ-ADHs can indeed be beneficial for growth on glycerol and that  
289 a functionally active PedH enzyme is the underlying cause for the  $\text{La}^{3+}$ -dependent differences in lag-  
290 times and growth rates and to some extent also for differences in  $\text{OD}_{600}^{\text{max}}$  of KT2440 cultures. As PedE  
291 and PedH as well as the remaining proteins that were found to be differentially abundant in response  
292 to  $\text{La}^{3+}$  during growth on glycerol, are not part of the described degradation pathway in *P. putida*  
293 KT2440 (57, 58), we hypothesized that an additional metabolic route exists (**Fig. 3**). Based on our  
294 proteomic data, this route could be initiated by the activity of PedH and the oxidation of glycerol to  
295 glycolaldehyde. In the next steps glycolaldehyde could be oxidized to glycerate by PedH, the aldehyde  
296 dehydrogenase AldB-II, or the aldehyde oxidase complex composed of proteins PP\_3621 (IorA-II),  
297 PP\_3622 and PP\_3623 (AdhB). After phosphorylation by the glycerate kinase Gark, glycerate-2-  
298 phosphate could eventually enter the central metabolism.

299 If such a metabolic route exists, a  $\Delta\text{glpFKRD}$  deletion strain should still be able to grow with glycerol as  
300 sole source of carbon and energy, whereas a  $\Delta\text{pedE} \Delta\text{pedH} \Delta\text{glpFKRD}$  deletion mutant should not. To  
301 test this scenario, the corresponding strains were constructed and characterized for their growth  
302 phenotypes (**Fig. 4A**). We found that *P. putida* KT2440 indeed grew on glycerol independent of the  
303 GlpFKRD pathway, although growth was dramatically impaired compared to the parental strain or  
304 strain  $\Delta\text{pedE} \Delta\text{pedH}$ . When PedE and PedH were additionally deleted, no growth was observed even  
305 after a prolonged incubation time of 5 d. This supported our hypothesis that a metabolic route for

306 glycerol next to the GlpFKRD pathway exists and that this route is initiated by PedE and PedH, most  
307 likely by the oxidation of glycerol to glyceraldehyde (**Fig. 3**). Given that the route further proceeds *via*  
308 glycerate and glycerate-2-phosphate, different cellular concentrations of these metabolites would be  
309 expected during growth on glycerol in a mutant that is not able to use the GlpFKRD pathway.  
310 Interestingly, a companion study to this work employed a metabolome analysis using glycerol-growing  
311 cells of *P. putida* KT2440 and a  $\Delta glpK$  deletion strain, which can only use the proposed novel route *via*  
312 PedE and PedH (59). In their experiments, the authors observed that the glycerate concentration  
313 measured for the  $\Delta glpK$  strain was dramatically increased compared to the wild type, whereas  
314 concentrations of glyceraldehyde and glyceraldehyde-3-phosphate were in the same range for both  
315 strains. These data suggested that glycerate is indeed an intermediate during *glpFKRD*-independent  
316 growth, and that the activity of downstream proteins represent the bottleneck of the metabolic route  
317 leading to the observed accumulation. As our proteomic data indicated the involvement of the  
318 predicted glycerate kinase Gark, we constructed a  $\Delta garK$  deletion strain and speculated that this strain  
319 should lack the ability to phosphorylate glycerate and would hence be incapable of channelling  
320 glycerate-2-phosphate into the central metabolism. We indeed observed no growth of a  $\Delta garK$  mutant  
321 on glycerate even after incubation of up to 5 d, while strain  $\Delta pedE \Delta pedH \Delta glpFKRD$  could grow and  
322 reached  $OD_{600}^{max}$  within 72 h of incubation under the condition tested (**Fig. 4B**).

323 When grown on glycerol, no significant effect on growth rates and lag-times as well as only a minor,  
324 but significant, negative effect on the  $OD_{600}^{max}$  ( $p < 0.01$ ) was observed for the  $\Delta garK$  deletion in the  
325 absence of  $La^{3+}$ . In contrast, the same deletion caused a dramatic growth impairment in the presence  
326 of  $La^{3+}$  (**Fig. 5A, Table 2**) and consequently the stationary phase was not reached during the 40 h of  
327 incubation. Hence, no reliable growth parameter could be deduced from these data. It is however  
328 obvious that the growth rate was far below the one of the parental strain in the presence of  $La^{3+}$ .

329 Notably, some of the most severely upregulated proteins in response to  $La^{3+}$  are either related to  
330 stress, namely the multidrug efflux pump MexEF and the alkylhydroperoxide reductase subunits AhpC  
331 and AhpF, or are enzymes that play no obvious roles within the proposed metabolic route such as CalA,  
332 a predicted coniferyl alcohol dehydrogenase, and the glycolate oxidase GlcDEF. To investigate the

333 potential influence of the latter two enzymes, we constructed and analysed the corresponding  $\Delta calA$   
334 and  $\Delta glcDEF$  mutants and tested their growth pattern with glycerol (**Fig. 5B; Table 2**). The  $\Delta glcDEF$   
335 mutant showed a growth behaviour similar to the parental strain. In contrast, the  $\Delta calA$  strain  
336 exhibited a significantly increased growth rate ( $p < 0.01$ ) and higher  $OD_{600}^{max}$  ( $p < 0.01$ ) than the  
337 parental strain in the presence of  $La^{3+}$  while showing no significant differences in  $OD_{600}^{max}$  and maximal  
338 growth rate and only minor differences ( $p < 0.05$ ) in lag-times in the absence of  $La^{3+}$  (**Fig. 5C; Table 2**).



## 339 Discussion

340 In the present study, the cellular responses of *P. putida* KT2440 towards  $\text{La}^{3+}$ -availability during growth  
341 on several carbon and energy sources were investigated. The only protein that showed a differential  
342 abundance independent of the substrate used for growth was the  $\text{Ca}^{2+}$ -dependent PQQ-ADH PedE.  
343 This result is in line with data from a previous study (38), which demonstrated that the  $\text{La}^{3+}$ -induced  
344 downregulation of *pedE* is dependent on the PedS2/PedR2 two-component system that, based on our  
345 current observation, seems to be functional under all tested conditions. The other two proteins that  
346 showed differential abundance under more than one culture condition (PedH, PP\_2673) are both also  
347 part of the *ped* gene cluster. Notably, the carbon and energy sources under which these proteins were  
348 identified either represent substrates of PedE and PedH, or can be converted by an enzyme that  
349 depends on the same PQQ-cofactor, namely the glucose dehydrogenase Gcd. The remaining 53  
350 proteins that showed differential abundance in response to  $\text{La}^{3+}$  were identified only during growth on  
351 one specific carbon and energy source, suggesting a conditional regulation. For glycerol, we provide  
352 striking evidence that the increased activity of PedH compared to PedE is the primary cause for the  
353 observed proteomic and physiological changes during growth.

354 Thus far, the degradation of glycerol was described to start by the uptake *via* GlpF, phosphorylation by  
355 GlpK, and subsequent GlpD-catalysed oxidation of glycerol-3-phosphate to dihydroxyacetone-3-  
356 phosphate (58). In a next step, dihydroxyacetone-3-phosphate is interconverted to glyceraldehyde-3-  
357 phosphate and enters the central metabolism. This pathway is negatively regulated by the  
358 transcriptional regulator GlpR, and the de-repression of the *glpFKRD* operon is believed to depend on  
359 the intracellular concentration of glycerol-3-phosphate, which finally impacts the lag-phase of cultures  
360 (57). As such, it was interesting to find that growth on glycerol in the presence of  $\text{La}^{3+}$  led to a shorter  
361 lag phase and lower growth rate of the parent strain, and that a  $\Delta pedE \Delta pedH$  mutant showed a lag-  
362 phase similar to the parent in absence of  $\text{La}^{3+}$  without any beneficial effect of  $\text{La}^{3+}$  while still growing  
363 with a higher growth rate than the parent strain in presence of  $\text{La}^{3+}$ . Further experiments revealed that  
364 a  $\Delta glpFKRD$  deletion strain is still able to grow on glycerol, while a  $\Delta pedE \Delta pedH \Delta glpFKRD$  is not.

365 Together with the notion that a *ΔgarK* mutant cannot utilize glycerate, this strongly indicates the  
366 existence of a novel route for glycerol metabolism, in which PedE and PedH catalyse the initial  
367 oxidation of glycerol to glyceraldehyde. In the presence of  $\text{La}^{3+}$ , the route seems to proceed *via* a  
368 second oxidation step to glycerate, which is subsequently converted to glycerate-2-phosphate by the  
369 activity of GarK (**Fig. 3**). The PedE/PedH-dependent route, despite being important for efficient growth,  
370 clearly is not the main route for glycerol metabolism, as the effect of the *ΔpedE ΔpedH* deletion on the  
371 lag-phase with glycerol is far less severe than deletion of the *glpFKRD* gene cluster. It also appears that  
372 the PedE/PedH-dependent route is less efficient than the GlpFKRD pathway, as the overall growth of  
373 the *ΔglpFKRD* strain is substantially impaired in comparison to the *ΔpedE ΔpedH* strain.

374 A possible explanation could be the formation of the toxic intermediate glyceraldehyde, which is  
375 known for its protein crosslinking properties and the formation of superoxide radicals due to auto-  
376 oxidation (60, 61). The observed differences in growth rates and  $\text{OD}_{600}^{\text{max}}$  in response to  $\text{La}^{3+}$  in the  
377 parent strain could thus reflect the increased metabolic flux towards glyceraldehyde due to the higher  
378 specific activity of PedH compared to PedE. This would also explain the severe  $\text{La}^{3+}$ -dependent growth  
379 impairment of the *ΔgarK* mutant, as one can assume that even higher concentrations of  
380 glyceraldehyde accumulate in a mutant that cannot process glycerate. The notion that the MexEF RND-  
381 type transporter proteins, which are involved in efflux of various toxic compounds (62), and the  
382 alkylhydroperoxide reductase subunits AhpC and AhpF, which have been linked to ROS detoxification  
383 in *P. putida* (63), were also more abundant in presence of  $\text{La}^{3+}$  during growth on glycerol are supportive  
384 of such a hypothesis.

385 To explain the impact of  $\text{La}^{3+}$  on the lag-times of cultures, one could speculate that in addition to  
386 glycerol-3-phosphate, also other phosphorylated derivatives, such as glycerate-2-phosphate, are able  
387 to relieve the repression of *glpFKRD* by GlpR. However, as in the absence of  $\text{La}^{3+}$  the growth phenotype  
388 of the *ΔgarK* mutant is indistinguishable from that of the parental strain, and since the growth rate of  
389 the parent strain in absence of  $\text{La}^{3+}$  is still significantly higher than the growth rate of strain *ΔpedE*  
390 *ΔpedH*, we postulate that yet another metabolic route is present that contributes to growth without  
391 affecting the lag-phase. This second route could proceed *via* the phosphorylation of glyceraldehyde to

392 glyceraldehyde-3-phosphate by the activity of a so-far unknown kinase. Whether both alternative  
393 routes to the GlpFKRD pathway are functional in parallel or whether the metabolic flux *via* glycerate is  
394 exclusively induced in the presence of La<sup>3+</sup> is currently unknown and would need to be tested in future  
395 studies. Similarly, the question why proteins that cannot be associated to the newly discovered routes  
396 for glycerol are among the most differentially abundant proteins in response to La<sup>3+</sup> remains to be  
397 elucidated. It is however worthwhile noting that CalA and GlcDEF are either known (GlcDEF) or  
398 predicted (CalA) by the PROSITE software tool (<https://prosite.expasy.org/>) (64) to be catalytically  
399 active on 2-hydroxy acids. As such, potential activities towards pathway intermediates such as  
400 glycerate cannot be excluded at the moment.

401 From our data, the La<sup>3+</sup>-dependent proteomic and physiological changes during growth on glycerol can  
402 be explained by a shift in metabolic flux resulting from the differences in specific catalytic activities  
403 between PedH and PedE. A similar metabolic-driven interpretation can also be used to explain the  
404 proteomic differences during growth on other carbon and energy sources that are known to be  
405 substrates for PedE and PedH such as 2-phenylethanol. However, this logic fails to explain the  
406 differences observed during growth on glucose and citrate, as they do not represent substrates for  
407 PedE and/or PedH. Despite the fact that we currently do not know the underlying cause for the  
408 conditional proteomic changes under these conditions, it indicates the presence of additional effects  
409 of REEs beside the interaction with PedH and PedS2/PedR2. Such effects could include the inhibition  
410 of protein functions by mismetallation (65, 66), changes in the physiology of the outer membrane (67),  
411 or so far unknown REE-dependent enzymes and regulator proteins. The latter explanation is of  
412 particular interest, as two recent studies provide strong evidence that specific importers that can  
413 transport Ln<sup>3+</sup> into the cytoplasm of methylotrophic bacteria do exist (41, 68).

414 Altogether, the current study demonstrates that the utilization of REEs can influence important  
415 physiological traits of *P. putida*, which could be highly beneficial in competitive environmental niches  
416 such as the rhizosphere. The previously reported fertilizing effect of REEs on different food crops could  
417 hence be partially the result of increased competitiveness of plant growth promoting organisms such  
418 as *P. putida* during root colonization. This hypothesis is further supported by a recent study, which

419 found that Pseudomonads predominantly thrive on root exudates *in vivo* and are hence enriched in  
420 the rhizosphere of *Arabidopsis thaliana* (10). As such, it will be interesting to see what future research  
421 will add to the currently emerging theme of REEs being an important micronutrient for methylotrophic  
422 and non-methylotrophic organisms.

423 **Reference**

- 424 1. Mendes R, Garbeva P, Raaijmakers J. 2013. The rhizosphere microbiome: significance of plant  
425 beneficial, plant pathogenic, and human pathogenic microorganisms. *FEMS Microbiol Rev*  
426 37:634–663.
- 427 2. Raaijmakers J, Paulitz TC, Steinberg C, Alabouvette C, Moënne-Loccoz Y. 2009. The rhizosphere:  
428 a playground and battlefield for soilborne pathogens and beneficial microorganisms. *Plant Soil*  
429 321:341–361.
- 430 3. Berg G, Roskot N, Steidle A, Eberl L, Zock A, Smalla K. 2002. Plant-Dependent Genotypic and  
431 Phenotypic Diversity of Antagonistic Rhizobacteria Isolated from Different *Verticillium* Host  
432 Plants. *Appl Environ Microbiol* 68:3328–3338.
- 433 4. Carvalhais LC, Dennis PG, Fedoseyenko D, Hajirezaei MR, Borriss R, Von Wirén N. 2011. Root  
434 exudation of sugars, amino acids, and organic acids by maize as affected by nitrogen,  
435 phosphorus, potassium, and iron deficiency. *J Plant Nutr Soil Sci* 174:3–11.
- 436 5. Dakora FD, Phillips DA. 2002. Root exudates as mediators of mineral acquisition in low-nutrient  
437 environments. *Plant Soil* 245:35–47.
- 438 6. Schmidt R, Cordovez V, de Boer W, Raaijmakers J, Garbeva P. 2015. Volatile affairs in microbial  
439 interactions. *ISME J* 9:2329–2335.
- 440 7. Insam H, Seewald MSA. 2010. Volatile organic compounds (VOCs) in soils. *Biol Fertil Soils*  
441 46:199–213.
- 442 8. Wackett LP. 2003. *Pseudomonas putida*—a versatile biocatalyst. *Nat Biotechnol* 21:136–138.
- 443 9. Nelson KE, Weinel C, Paulsen IT, Dodson RJ, Hilbert H, Martins dos Santos VAP, Fouts DE, Gill  
444 SR, Pop M, Holmes M, Brinkac L, Beanan M, DeBoy RT, Daugherty S, Kolonay J, Madupu R,  
445 Nelson W, White O, Peterson J, Khouri H, Hance I, Lee PC, Holtzapple E, Scanlan D, Tran K,  
446 Moazzez A, Utterback T, Rizzo M, Lee K, Kosack D, Mostl D, Wedler H, Lauber J, Stjepandic D,  
447 Hoheisel J, Straetz M, Heim S, Kiewitz C, Eisen J, Timmis KN, Dusterhoft A, Tumbler B, Fraser  
448 CM. 2002. Complete genome sequence and comparative analysis of the metabolically versatile  
449 *Pseudomonas putida* KT2440. *Environ Microbiol* 4:799–808.

- 450 10. Worsley SF, Macey MC, Newitt JT, Patrick E, Yu DW, Wilkinson B, Murrell C, Hutchings MI. 2019.  
451 Investigating the role of exudates in recruiting *Streptomyces* bacteria to the *Arabidopsis*  
452 *thaliana* root microbiome. bioRxiv 532309.
- 453 11. Mückschel B, Simon O, Klebensberger J, Graf N, Rosche B, Altenbuchner J, Pfannstiel J, Huber  
454 A, Hauer B. 2012. Ethylene glycol metabolism by *Pseudomonas putida*. Appl Environ Microbiol  
455 78:8531–9.
- 456 12. Wehrmann M, Billard P, Martin-Meriadec A, Zegeye A, Klebensberger J. 2017. Functional Role  
457 of Lanthanides in Enzymatic Activity and Transcriptional Regulation of Pyrroloquinoline  
458 Quinone-Dependent Alcohol Dehydrogenases in *Pseudomonas putida* KT2440. MBio 8:e00570-  
459 17.
- 460 13. Takeda K, Matsumura H, Ishida T, Samejima M, Igarashi K, Nakamura N, Ohno H. 2013. The two-  
461 step electrochemical oxidation of alcohols using a novel recombinant PQQ alcohol  
462 dehydrogenase as a catalyst for a bioanode. Bioelectrochemistry 94:75–78.
- 463 14. Firsching FH, Brune SN. 1991. Solubility products of the trivalent rare-earth phosphates. J Chem  
464 Eng Data 36:93–95.
- 465 15. Pol A, Barends TRM, Dietl A, Khadem AF, Eygensteyn J, Jetten MSM, Op den Camp HJM. 2014.  
466 Rare earth metals are essential for methanotrophic life in volcanic mudpots. Environ Microbiol  
467 16:255–264.
- 468 16. Hibi Y, Asai K, Arafuka H, Hamajima M, Iwama T, Kawai K. 2011. Molecular structure of La<sup>3+</sup>-  
469 induced methanol dehydrogenase-like protein in *Methylobacterium radiotolerans*. J Biosci  
470 Bioeng 111:547–549.
- 471 17. Fitriyanto NA, Fushimi M, Matsunaga M, Pertiwiningrum A, Iwama T, Kawai K. 2011. Molecular  
472 structure and gene analysis of Ce<sup>3+</sup>-induced methanol dehydrogenase of *Bradyrhizobium* sp.  
473 MAFF211645. J Biosci Bioeng 111:613–617.
- 474 18. Good NM, Vu HN, Suriano CJ, Subuyuj GA, Skovran E, Martinez-Gomez NC. 2016.  
475 Pyrroloquinoline Quinone Ethanol Dehydrogenase in *Methylobacterium extorquens* AM1  
476 Extends Lanthanide-Dependent Metabolism to Multicarbon Substrates. J Bacteriol 198:3109–

- 477 3118.
- 478 19. Vu HN, Subuyuj GA, Vijayakumar S, Good NM, Martinez-Gomez NC, Skovran E. 2016.  
479 Lanthanide-Dependent Regulation of Methanol Oxidation Systems in *Methylobacterium*  
480 *extorquens* AM1 and Their Contribution to Methanol Growth. J Bacteriol 198:1250–1259.
- 481 20. Masuda S, Suzuki Y, Fujitani Y, Mitsui R, Nakagawa T, Shintani M, Tani A. 2018. Lanthanide-  
482 Dependent Regulation of Methylotrophy in *Methylobacterium aquaticum* Strain 22A. mSphere  
483 3:e00462-17.
- 484 21. Chistoserdova L. 2016. Lanthanides: New life metals? World J Microbiol Biotechnol 32:138.
- 485 22. Keltjens JT, Pol A, Reimann J, Op den Camp HJM. 2014. PQQ-dependent methanol  
486 dehydrogenases: rare-earth elements make a difference. Appl Microbiol Biotechnol 98:6163–  
487 83.
- 488 23. Sowell SM, Abraham PE, Shah M, Verberkmoes NC, Smith DP, Barofsky DF, Giovannoni SJ. 2011.  
489 Environmental proteomics of microbial plankton in a highly productive coastal upwelling  
490 system. ISME J 5:856–865.
- 491 24. Taubert M, Grob C, Howat AM, Burns OJ, Dixon JL, Chen Y, Murrell JC. 2015. XoxF encoding an  
492 alternative methanol dehydrogenase is widespread in coastal marine environments. Environ  
493 Microbiol 17:3937–3948.
- 494 25. Lv H, Sahin N, Tani A. 2018. Isolation and genomic characterization of *Novimethylophilus*  
495 *kurashikiensis* gen. nov. sp. nov., a new lanthanide-dependent methylotrophic species of  
496 Methylophilaceae. Environ Microbiol 20:1204–1223.
- 497 26. Cotruvo JA, Featherston ER, Mattocks JA, Ho J V, Laremore TN. 2018. Lanmodulin: A Highly  
498 Selective Lanthanide-Binding Protein from a Lanthanide-Utilizing Bacterium. J Am Chem Soc  
499 jacs.8b09842.
- 500 27. Gu W, Semrau JD. 2017. Copper and cerium-regulated gene expression in *Methylosinus*  
501 *trichosporium* OB3b. Appl Microbiol Biotechnol 101:8499–8516.
- 502 28. Good NM, Walser ON, Moore RS, Suriano CJ, Huff AF, Martinez-Gomez NC. 2018. Investigation  
503 of lanthanide-dependent methylotrophy uncovers complementary roles for alcohol

- 504 dehydrogenase enzymes. bioRxiv 329011.
- 505 29. Fitriyanto NA, Nakamura M, Muto S, Kato K, Yabe T, Iwama T, Kawai K, Pertiwiningrum A. 2011.
- 506 Ce<sup>3+</sup>-induced exopolysaccharide production by *Bradyrhizobium* sp. MAFF211645. J Biosci
- 507 Bioeng 111:146–152.
- 508 30. Zheng Y, Huang J, Zhao F, Chistoserdova L. 2018. Physiological Effect of XoxG(4) on Lanthanide-
- 509 Dependent Methanotrophy. MBio 9:e02430-17.
- 510 31. Krause SMB, Johnson T, Samadhi Karunaratne Y, Fu Y, Beck DAC, Chistoserdova L, Lidstrom ME.
- 511 2017. Lanthanide-dependent cross-feeding of methane-derived carbon is linked by microbial
- 512 community interactions. Proc Natl Acad Sci 114:358–363.
- 513 32. Akberdin IR, Collins DA, Hamilton R, Oshchepkov DY, Shukla AK, Nicora CD, Nakayasu ES, Adkins
- 514 JN, Kalyuzhnaya MG. 2018. Rare Earth Elements Alter Redox Balance in *Methylobacterium*
- 515 *alcaliphilum* 20ZR. Front Microbiol 9:1–12.
- 516 33. Diatloff E, Smith FW, Asher CJ. 1995. Rare earth elements and plant growth: III. Responses of
- 517 corn and mungbean to low concentrations of cerium in dilute, continuously flowing nutrient
- 518 solutions. J Plant Nutr 18:1991–2003.
- 519 34. Diatloff E, Asher CJ, Smith FW. 1996. Rare earth elements and plant growth. Proc 8th Aust Agron
- 520 Conf Toowoomba, Queensland, Aust 30 January-2 February, 1996 3–6.
- 521 35. Pang X, Li D, Peng A. 2002. Application of rare-earth elements in the agriculture of China and
- 522 its environmental behavior in soil. Environ Sci Pollut Res 9:143–148.
- 523 36. Wahid PA, Valiathan MS, Kamalam N V., Eapen JT, Vijayalakshmi S, Prabhu RK, Mahalingam TR.
- 524 2000. Effect of rare earth elements on growth and nutrition of coconut palm and root
- 525 competition for these elements between the palm and *calotropis gigantea*. J Plant Nutr 23:329–
- 526 338.
- 527 37. Xie ZB, Zhu JG, Chu HY, Zhang YL, Zeng Q, Ma HL, Cao ZH. 2002. Effect of lanthanum on rice
- 528 production, nutrient uptake, and distribution. J Plant Nutr 25:2315–2331.
- 529 38. Wehrmann M, Berthelot C, Billard P, Klebensberger J. 2018. The PedS2/PedR2 Two-Component
- 530 System Is Crucial for the Rare Earth Element Switch in *Pseudomonas putida* KT2440. mSphere



- 531 3:1–12.
- 532 39. Farhan UI Haque M, Kalidass B, Bandow N, Turpin EA, DiSpirito AA, Semrau JD. 2015. Cerium  
533 Regulates Expression of Alternative Methanol Dehydrogenases in *Methylosinus trichosporium*  
534 OB3b. *Appl Environ Microbiol* 81:7546–7552.
- 535 40. Chu F, Beck DAC, Lidstrom ME. 2016. MxaY regulates the lanthanide-mediated methanol  
536 dehydrogenase switch in *Methylomicrobium buryatense*. *PeerJ* 4:e2435.
- 537 41. Ochsner AM, Hemmerle L, Vonderach T, Nüssli R, Bortfeld-Miller M, Hattendorf B, Vorholt JA.  
538 2019. Use of rare-earth elements in the phyllosphere colonizer *Methylobacterium extorquens*  
539 PA1. *Mol Microbiol* doi:10.1111/mmi.14208.
- 540 42. Chu F, Lidstrom ME. 2016. XoxF Acts as the Predominant Methanol Dehydrogenase in the Type  
541 I Methanotroph *Methylomicrobium buryatense*. *J Bacteriol* 198:1317–1325.
- 542 43. Maniatis T, Fritsch E, Sambrook J, Laboratory CSH. 1982. *Molecular Cloning : A Laboratory*  
543 *Manual*. Cold Spring Harbor, N.Y. Cold Spring Harbor Laboratory.
- 544 44. Kahm M, Kschischo M, Ludwig J, Lichtenberg-Fraté H, Hasenbrink G. 2015. grofit : Fitting  
545 Biological Growth Curves with R . *J Stat Softw* 33.
- 546 45. Gibson DG. 2011. Enzymatic Assembly of Overlapping DNA Fragments, p. 349–361. *In* *Methods*  
547 *in Enzymology*.
- 548 46. Graf N, Altenbuchner J. 2011. Development of a method for markerless gene deletion in  
549 *Pseudomonas putida*. *Appl Environ Microbiol* 77:5549–5552.
- 550 47. Wessel D, Flügge UI. 1984. A method for the quantitative recovery of protein in dilute solution  
551 in the presence of detergents and lipids. *Anal Biochem* 138:141–143.
- 552 48. Bradford MM. 1976. A rapid and sensitive method for the quantitation of microgram quantities  
553 of protein utilizing the principle of protein-dye binding. *Anal Biochem* 72:248–254.
- 554 49. Rappsilber J, Ishihama Y, Mann M. 2003. Stop and Go Extraction Tips for Matrix-Assisted Laser  
555 Desorption/Ionization, Nanoelectrospray, and LC/MS Sample Pretreatment in Proteomics. *Anal*  
556 *Chem* 75:663–670.
- 557 50. de Godoy LMF, Mortensen P, Makarov A, Li G, Macek B, Horning S, Pesch R, Mann M, Olsen J

- 558 V., Lange O. 2005. Parts per Million Mass Accuracy on an Orbitrap Mass Spectrometer via Lock  
559 Mass Injection into a C-trap. *Mol Cell Proteomics* 4:2010–2021.
- 560 51. Cox J, Mann M. 2008. MaxQuant enables high peptide identification rates, individualized p.p.b.-  
561 range mass accuracies and proteome-wide protein quantification. *Nat Biotechnol* 26:1367–  
562 1372.
- 563 52. Cox J, Neuhauser N, Michalski A, Scheltema RA, Olsen J V., Mann M. 2011. Andromeda: A  
564 Peptide Search Engine Integrated into the MaxQuant Environment. *J Proteome Res* 10:1794–  
565 1805.
- 566 53. Bateman A, Martin MJ, O'Donovan C, Magrane M, Alpi E, Antunes R, Bely B, Bingley M, Bonilla  
567 C, Britto R, Bursteinas B, Bye-Ajee H, Cowley A, Da Silva A, De Giorgi M, Dogan T, Fazzini F,  
568 Castro LG, Figueira L, Garmiri P, Georghiou G, Gonzalez D, Hatton-Ellis E, Li W, Liu W, Lopez R,  
569 Luo J, Lussi Y, MacDougall A, Nightingale A, Palka B, Pichler K, Poggioli D, Pundir S, Pureza L, Qi  
570 G, Rosanoff S, Saidi R, Sawford T, Shypitsyna A, Speretta E, Turner E, Tyagi N, Volynkin V, Wardell  
571 T, Warner K, Watkins X, Zaru R, Zellner H, Xenarios I, Bougueleret L, Bridge A, Poux S, Redaschi  
572 N, Aimo L, ArgoudPuy G, Auchincloss A, Axelsen K, Bansal P, Baratin D, Blatter MC, Boeckmann  
573 B, Bolleman J, Boutet E, Breuza L, Casal-Casas C, De Castro E, Coudert E, Cuche B, Doche M,  
574 Dornevil D, Duvaud S, Estreicher A, Famiglietti L, Feuermann M, Gasteiger E, Gehant S, Gerritsen  
575 V, Gos A, Gruaz-Gumowski N, Hinz U, Hulo C, Jungo F, Keller G, Lara V, Lemercier P, Lieberherr  
576 D, Lombardot T, Martin X, Masson P, Morgat A, Neto T, Nospikel N, Paesano S, Pedruzzi I,  
577 Pilbout S, Pozzato M, Pruess M, Rivoire C, Roechert B, Schneider M, Sigrist C, Sonesson K, Staehli  
578 S, Stutz A, Sundaram S, Tognolli M, Verbregue L, Veuthey AL, Wu CH, Arighi CN, Arminski L,  
579 Chen C, Chen Y, Garavelli JS, Huang H, Laiho K, McGarvey P, Natale DA, Ross K, Vinayaka CR,  
580 Wang Q, Wang Y, Yeh LS, Zhang J. 2017. UniProt: the universal protein knowledgebase. *Nucleic  
581 Acids Res* 45:D158–D169.
- 582 54. Tyanova S, Temu T, Sinitcyn P, Carlson A, Hein MY, Geiger T, Mann M, Cox J. 2016. The Perseus  
583 computational platform for comprehensive analysis of (prote)omics data. *Nat Methods* 13:731–  
584 740.

- 585 55. Vizcaíno JA, Csordas A, Del-Toro N, Dienes JA, Griss J, Lavidas I, Mayer G, Perez-Riverol Y,  
586 Reisinger F, Ternent T, Xu Q-W, Wang R, Hermjakob H. 2016. 2016 update of the PRIDE database  
587 and its related tools. *Nucleic Acids Res* 44:D447–D456.
- 588 56. Galperin MY, Makarova KS, Wolf YI, Koonin E V. 2015. Expanded microbial genome coverage  
589 and improved protein family annotation in the COG database. *Nucleic Acids Res* 43:D261–D269.
- 590 57. Nikel PI, Romero-Campero FJ, Zeidman J a, Goñi-Moreno Á, de Lorenzo V. 2015. The Glycerol-  
591 Dependent Metabolic Persistence of *Pseudomonas putida* KT2440 Reflects the Regulatory Logic  
592 of the GlpR Repressor. *MBio* 6:1–13.
- 593 58. Nikel PI, Kim J, de Lorenzo V. 2014. Metabolic and regulatory rearrangements underlying  
594 glycerol metabolism in *Pseudomonas putida* KT2440. *Environ Microbiol* 16:239–254.
- 595 59. Walsh M, Casey M, Kenny S, Narancic T, Blank L, Wierckx N, Ballerstedt H, O'Connor KE. 2019.  
596 Insights into an alternative pathway for glycerol metabolism in a glycerol kinase deficient  
597 *Pseudomonas putida* KT2440. bioRxiv 567230.
- 598 60. Tessier FJ, Monnier VM, Sayre LM, Kornfield JA. 2003. Triosidines: novel Maillard reaction  
599 products and cross-links from the reaction of triose sugars with lysine and arginine residues.  
600 *Biochem J* 369:705–719.
- 601 61. Benov L, Beema AF. 2003. Superoxide-dependence of the short chain sugars-induced  
602 mutagenesis. *Free Radic Biol Med* 34:429–433.
- 603 62. Li XZ, Zhang L, Poole K. 1998. Role of the multidrug efflux systems of *Pseudomonas aeruginosa*  
604 in organic solvent tolerance. *J Bacteriol* 180:2987–91.
- 605 63. Hishinuma S, Yuki M, Fujimura M, Fukumori F. 2006. OxyR regulated the expression of two  
606 major catalases, KatA and KatB, along with peroxiredoxin, AhpC in *Pseudomonas putida*.  
607 *Environ Microbiol* 8:2115–2124.
- 608 64. Sigrist CJA, de Castro E, Cerutti L, Cuče BA, Hulo N, Bridge A, Bougueleret L, Xenarios I. 2012.  
609 New and continuing developments at PROSITE. *Nucleic Acids Res* 41:D344–D347.
- 610 65. Agarwal N, Kalra VK. 1983. Interaction of lanthanide cations and uranyl ion with the  
611 calcium/proton antiport system in *Mycobacterium phlei*. *Biochim Biophys Acta - Biomembr*

- 612 727:285–292.
- 613 66. Brown PH, Rathjen AH, Graham RD, Tribe DE. 1990. Chapter 92 Rare earth elements in biological  
614 systems, p. 423–452. *In Handbook on the Physics and Chemistry of Rare Earths.*
- 615 67. Peng L, Yi L, Zhexue L, Juncheng Z, Jiabin D, Daiwen P, Ping S, Songsheng Q. 2004. Study on  
616 biological effect of La<sup>3+</sup> on *Escherichia coli* by atomic force microscopy. *J Inorg Biochem* 98:68–  
617 72.
- 618 68. Mattocks JA, Ho J V., Cotruvo JA. 2019. A Selective, Protein-Based Fluorescent Sensor with  
619 Picomolar Affinity for Rare Earth Elements. *J Am Chem Soc jacs*.8b12155.
- 620
- 621

622 **Tables**

623

624 **Table 1:** Specific enzyme activities of purified PedE and PedH with the four tested growth substrates  
625 at 10 mM measured with 2,6-dichlorophenolindophenol (DCPIP) dependent colorimetric assay. Data  
626 represent the average of biological triplicates with according standard deviation. Activities below  
627 detection limit are indicated (n. d.).

628

| Substrate       | Mean Specific Activity (U mg <sup>-1</sup> ) ± SD |                            |
|-----------------|---------------------------------------------------|----------------------------|
|                 | PedE 1 mM Ca <sup>2+</sup>                        | PedH 1 μM La <sup>3+</sup> |
| Citrate         | n.d.                                              | n.d.                       |
| Glucose         | n.d.                                              | n.d.                       |
| Glycerol        | 0.3 ± 0.1                                         | 0.9 ± 0.1                  |
| 2-Phenylethanol | 8.0 ± 0.4                                         | 6.3 ± 0.3                  |

629

630 **Table 2:** Lag-times ( $\lambda$ ), maximal OD<sub>600</sub> during stationary phase (OD<sub>600</sub><sup>max</sup>), and maximal growth rates  
 631 ( $\mu_{\max}$ ) of different *P. putida* strains during growth with M9 medium supplemented with 20 mM glycerol  
 632 and 0  $\mu\text{M}$  or 10  $\mu\text{M}$  La<sup>3+</sup> incubated in microtiter plates at 30°C and 250 rpm (see also Fig. 2 and Fig.5).  
 633 Maximal growth rates and lag-times were determined by fitting growth curves to the Richards model  
 634 using “grofit” package in R (44). Cultures were incubated at 250 rpm and 30°C in microplate reader  
 635 with constant OD<sub>600</sub> measurement. Data points represent average of biological triplicates with  
 636 corresponding error ( $\lambda$ ,  $\mu_{\max}$ ) or standard deviation (OD<sub>600</sub><sup>max</sup>). No growth parameters could be  
 637 determined for cultures that did not reach stationary phase during incubation time (n. d.).  
 638

| Strain                    | $\lambda$ [h]                    |                                   | OD <sub>600</sub> <sup>max</sup> |                                   | $\mu_{\max}$ [h <sup>-1</sup> ]  |                                   |
|---------------------------|----------------------------------|-----------------------------------|----------------------------------|-----------------------------------|----------------------------------|-----------------------------------|
|                           | 0 $\mu\text{M}$ La <sup>3+</sup> | 10 $\mu\text{M}$ La <sup>3+</sup> | 0 $\mu\text{M}$ La <sup>3+</sup> | 10 $\mu\text{M}$ La <sup>3+</sup> | 0 $\mu\text{M}$ La <sup>3+</sup> | 10 $\mu\text{M}$ La <sup>3+</sup> |
| KT2440*                   | 17.3 ± 0.2                       | 10.2 ± 0.2                        | 0.884 ± 0.004                    | 0.680 ± 0.014                     | 0.341 ± 0.010                    | 0.201 ± 0.004                     |
| $\Delta pedE \Delta pedH$ | 17.5 ± 0.3                       | 17.2 ± 0.4                        | 0.869 ± 0.002                    | 0.802 ± 0.013                     | 0.276 ± 0.008                    | 0.291 ± 0.012                     |
| $\Delta garK$             | 17.1 ± 0.3                       | n.d.                              | 0.805 ± 0.005                    | n.d.                              | 0.321 ± 0.011                    | n.d.                              |
| $\Delta calA$             | 16.0 ± 0.3                       | 11.1 ± 0.3                        | 0.890 ± 0.004                    | 0.753 ± 0.006                     | 0.336 ± 0.011                    | 0.271 ± 0.008                     |
| $\Delta glcDEF$           | 17.0 ± 0.2                       | 10.1 ± 0.2                        | 0.862 ± 0.016                    | 0.678 ± 0.004                     | 0.315 ± 0.009                    | 0.207 ± 0.004                     |

639

640 **Table 3:** List of regulated proteins in presence of 10  $\mu$ M La<sup>3+</sup> compared to the absence of La<sup>3+</sup> when  
641 grown with glycerol as sole C-source.  
642

| Locus Tag | Protein name | Fold change induction (log <sub>2</sub> ) | - log <sub>10</sub> (p-value) |
|-----------|--------------|-------------------------------------------|-------------------------------|
| PP_2426   | CalA         | 6.28                                      | 4.03                          |
| PP_2679   | PedH         | 4.75                                      | 3.80                          |
| PP_3426   | MexF         | 3.93                                      | 3.24                          |
| PP_3425   | MexE         | 3.74                                      | 2.18                          |
| PP_4921   |              | 3.65                                      | 2.46                          |
| PP_2440   | AhpF         | 3.13                                      | 3.08                          |
| PP_3745   | GlcD         | 3.12                                      | 3.32                          |
| PP_3747   | GlcF         | 2.67                                      | 3.50                          |
| PP_3746   | GlcE         | 2.64                                      | 2.98                          |
| PP_4922   | ThiC         | 2.21                                      | 3.84                          |
| PP_3748   | GlcG         | 2.06                                      | 3.71                          |
| PP_3622   |              | 1.97                                      | 2.82                          |
| PP_3178   | GarK         | 1.77                                      | 2.85                          |
| PP_3621   | IorA-II      | 1.60                                      | 2.34                          |
| PP_0554   | AcoB         | 1.54                                      | 2.27                          |
| PP_3623   | AdhB         | 1.54                                      | 3.67                          |
| PP_2484   |              | 1.52                                      | 2.37                          |
| PP_0734   | HemK         | 1.51                                      | 2.67                          |
| PP_2439   | AhpC         | 1.39                                      | 2.02                          |
| PP_0556   |              | 1.35                                      | 2.34                          |
| PP_1125   |              | 1.30                                      | 3.01                          |
| PP_0555   | AcoA         | 1.20                                      | 2.52                          |
| PP_1548   |              | 1.19                                      | 2.03                          |
| PP_1351   | PanE         | -1.45                                     | 2.06                          |
| PP_2258   |              | -1.84                                     | 2.40                          |
| PP_5658   |              | -1.99                                     | 2.93                          |
| PP_3557   |              | -2.41                                     | 2.33                          |
| PP_3603   |              | -2.46                                     | 2.73                          |
| PP_4313   |              | -2.55                                     | 2.50                          |
| PP_0588   |              | -2.75                                     | 2.62                          |
| PP_2674   | PedE         | -4.25                                     | 3.78                          |
| PP_2673   |              | -5.37                                     | 3.71                          |
| PP_3732   |              | -5.78                                     | 3.07                          |

643

644 **Table S1:** Strains and plasmids used in the study

645

| Strains                                  | Relevant features                                                                                                                                                                                                                 | Source or reference |
|------------------------------------------|-----------------------------------------------------------------------------------------------------------------------------------------------------------------------------------------------------------------------------------|---------------------|
| KT2440*                                  | KT2440 with a markerless deletion of <i>upp</i>   Parent strain for deletion mutants                                                                                                                                              | (46)                |
| $\Delta pedE$                            | KT2440* with a markerless deletion of <i>pedE</i>                                                                                                                                                                                 | (11)                |
| $\Delta pedH$                            | KT2440* with a markerless deletion of <i>pedH</i>                                                                                                                                                                                 | (11)                |
| $\Delta calA$                            | KT2440* with a markerless deletion of <i>calA</i>                                                                                                                                                                                 | this study          |
| $\Delta garK$                            | KT2440* with a markerless deletion of gene <i>garK</i>                                                                                                                                                                            | this study          |
| $\Delta glcDEF$                          | KT2440* with a markerless deletion of gene cluster <i>glcDEF</i>                                                                                                                                                                  | this study          |
| $\Delta pedE \Delta pedH$                | KT2440* with a markerless deletion of <i>pedE</i> and <i>pedH</i>                                                                                                                                                                 | (11)                |
| $\Delta pedE \Delta pedH \Delta glpFKRD$ | $\Delta pedE \Delta pedH$ with a markerless deletion of gene cluster $\Delta glpFKRD$                                                                                                                                             | this study          |
| <i>E. coli</i> TOP10                     | <i>F- mcrA</i> $\Delta(mrr-hsdRMS-mcrBC)$ $\phi 80lacZ\Delta M15$ $\Delta lacX74$ <i>nupG</i> <i>recA1</i> <i>araD139</i> $\Delta(ara-leu)7697$ <i>galE15</i> <i>galK16</i> <i>rpsL(Str<sup>R</sup>)</i> <i>endA1</i> $\lambda^-$ | Invitrogen          |
| <b>Plasmids</b>                          |                                                                                                                                                                                                                                   |                     |
| pJOE6261.2                               | Suicide vector for gene deletions                                                                                                                                                                                                 | (46)                |
| pJOE-calA                                | pJOE6261.2 based deletion vector for gene <i>calA</i> (PP_2426)                                                                                                                                                                   | this study          |
| pJOE-garK                                | pJOE6261.2 based deletion vector for gene <i>garK</i> (PP_3178)                                                                                                                                                                   | this study          |
| pJOE-glp                                 | pJOE6261.2 based deletion vector for gene cluster <i>glpFKRD</i> (PP_1076 to PP_1073)                                                                                                                                             | this study          |
| pMW08                                    | pJOE6261.2 based deletion vector for gene cluster <i>glcDEF</i> (PP_3745 to PP_3747)                                                                                                                                              | this study          |

646



647 **Table S2:** Primers used in the study

648

| <b>Primer</b> |                                              |                              |
|---------------|----------------------------------------------|------------------------------|
| <b>Name</b>   | <b>Sequence 5' → 3'</b>                      | <b>Annealing temperature</b> |
| PcalA1        | CGATGGCCGCTTTGGTCCCGAGCCGTTCCACACTTTCGC      | 67°C                         |
| PcalA2        | AACCGATCAAGCAGGGCCTCGCAGTGAA                 | 67°C                         |
| PcalA3        | GAGGCCCTGCTTGATCGGTTGCCTGTACG                | 65°C                         |
| PcalA4        | CCTGCAGGTCGACTCTAGAGCGTGGGTGAGCAAGGCAG       | 65°C                         |
| PgarK1        | CGATGGCCGCTTTGGTCCCGAGTCGTTGCTGTGGTGCC       | 62°C                         |
| PgarK2        | TACAGGGTGTGGGGTTTCTCCTGTCCTG                 | 62°C                         |
| PgarK3        | GAGAAACCCACACCCTGTAGAAATGGCCTTATTG           | 67°C                         |
| PgarK4        | CCTGCAGGTCGACTCTAGAGCAGCGCAAACCTGACCATC      | 67°C                         |
| Pglp1         | CGATGGCCGCTTTGGTCCCGGTCATCAATAAAGGTCCG       | 55°C                         |
| Pglp2         | ACCGTAGGTAGTATGACCTCGTTTTTTTTG               | 55°C                         |
| Pglp3         | GAGGTCATACTACCTACGGTGAAGCCCTC                | 62°C                         |
| Pglp4         | CCTGCAGGTCGACTCTAGAGGTTGTGAAGACCGCCTGC       | 62°C                         |
| MWH03         | AGGCACGATGGCCGCTTTGGTCCCGCCTGCTCGGGCAGTTGTCC | 63°C                         |
| MWH04         | GCTAAGCATGGGCCATCGGCTCACTCGCAAC              | 63°C                         |
| MWH05         | AGTGAGCCGATGGCCATGCTTAGCAAGTTCTGTTATCG       | 63°C                         |
| MWH06         | GCATGCCTGCAGGTCGACTCTAGAGCCAGGGCAATGCGTATCAC | 63°C                         |

649

650 **Table S3:** List of regulated proteins in presence of 10  $\mu\text{M}$   $\text{La}^{3+}$  compared to the absence of  $\text{La}^{3+}$  when  
651 grown with 2-phenylethanol as sole C-source.  
652

| Locus Tag | Protein name | Fold change induction ( $\log_2$ ) | $-\log_{10}(p\text{-value})$ |
|-----------|--------------|------------------------------------|------------------------------|
| PP_2679   | PedH         | 3.41                               | 2.48                         |
| PP_3357   | Vdh          | 2.65                               | 2.92                         |
| PP_5125   | MutM         | 2.24                               | 3.15                         |
| PP_4905   | MotA         | 1.84                               | 2.01                         |
| PP_0091   |              | 1.71                               | 2.26                         |
| PP_5157   |              | 1.59                               | 2.20                         |
| PP_0342   | WaaC         | 1.43                               | 2.46                         |
| PP_3722   | Alr          | 1.04                               | 2.40                         |
| PP_2674   | PedE         | -1.49                              | 5.90                         |
| PP_2673   |              | -2.41                              | 3.91                         |

653

654 **Table S4:** List of regulated proteins in presence of 10  $\mu\text{M}$   $\text{La}^{3+}$  compared to the absence of  $\text{La}^{3+}$  when  
655 grown with glucose as sole C-source.  
656

| Locus Tag | Protein name | Fold change induction ( $\log_2$ ) | $-\log_{10}(p\text{-value})$ |
|-----------|--------------|------------------------------------|------------------------------|
| PP_2679   | PedH         | 4.35                               | 3.17                         |
| PP_4508   |              | 1.74                               | 2.97                         |
| PP_3713   | CatA         | 1.44                               | 2.43                         |
| PP_5221   |              | 1.39                               | 2.21                         |
| PP_0367   |              | 1.27                               | 2.47                         |
| PP_4796   | HolA         | -1.30                              | 2.15                         |
| PP_4374   | FliT         | -1.95                              | 2.45                         |
| PP_2666   |              | -2.01                              | 2.51                         |
| PP_3951   | PcaI         | -2.13                              | 2.68                         |
| PP_2680   | AldB-II      | -2.79                              | 2.41                         |
| PP_4632   | FolM         | -3.54                              | 2.53                         |
| PP_2662   |              | -3.61                              | 3.62                         |
| PP_1757   | BolA         | -3.64                              | 3.99                         |
| PP_2674   | PedE         | -6.97                              | 4.13                         |

657

658 **Table S5:** List of regulated proteins in presence of 10  $\mu\text{M}$   $\text{La}^{3+}$  compared to the absence of  $\text{La}^{3+}$  when  
659 grown with citrate as sole C-source.  
660

| Locus Tag | Protein name | Fold change induction ( $\log_2$ ) | $-\log_{10}(p\text{-value})$ |
|-----------|--------------|------------------------------------|------------------------------|
| PP_2491   |              | 2.27                               | 4.32                         |
| PP_0365   | BioC         | 1.12                               | 2.06                         |
| PP_4157   | KdpE         | -1.41                              | 2.72                         |
| PP_2674   | PedE         | -2.56                              | 2.80                         |
| PP_0634   | PilA         | -3.08                              | 3.88                         |

661

662 **Figures**

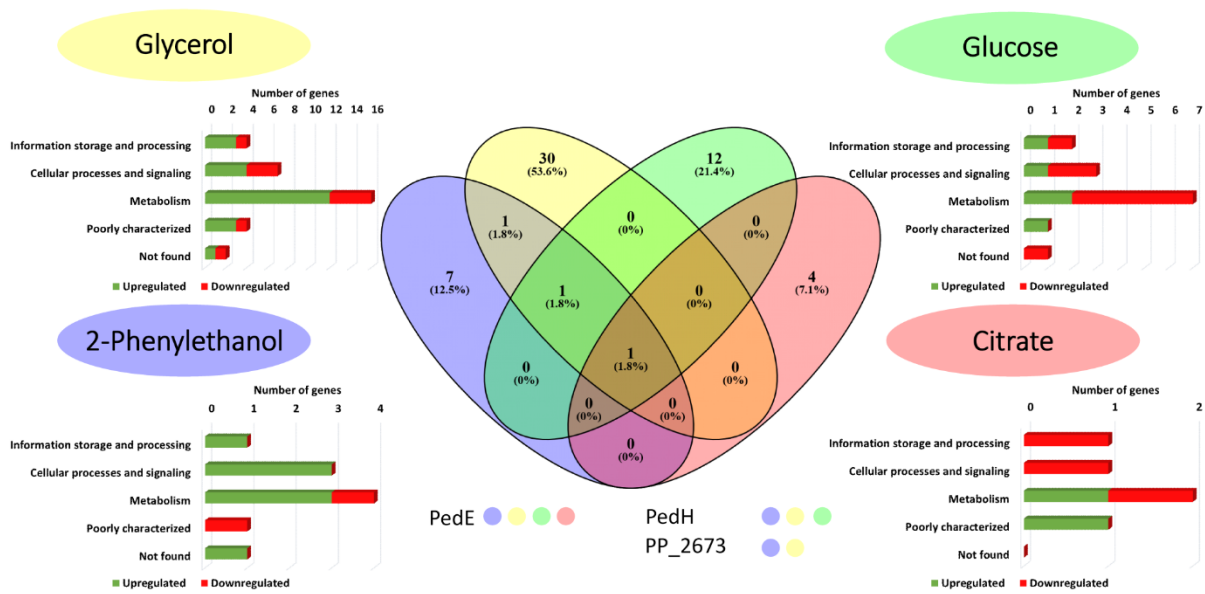

663  
664

665 **Figure 1:** Venn-diagram (middle) of differentially produced proteins in response to 10  $\mu\text{M}$   $\text{La}^{3+}$  during  
666 growth with glycerol, glucose, 2-phenylethanol and citrate. Proteins that showed up under several  
667 growth conditions are stated under the diagram with colour code for classification (yellow dot =  
668 glycerol; green dot = glucose; blue dot = 2-phenylethanol; red dot = citrate). Classifications of  
669 differentially expressed proteins according to the Cluster of Orthologous Groups database are depicted  
670 for each substrate.

671

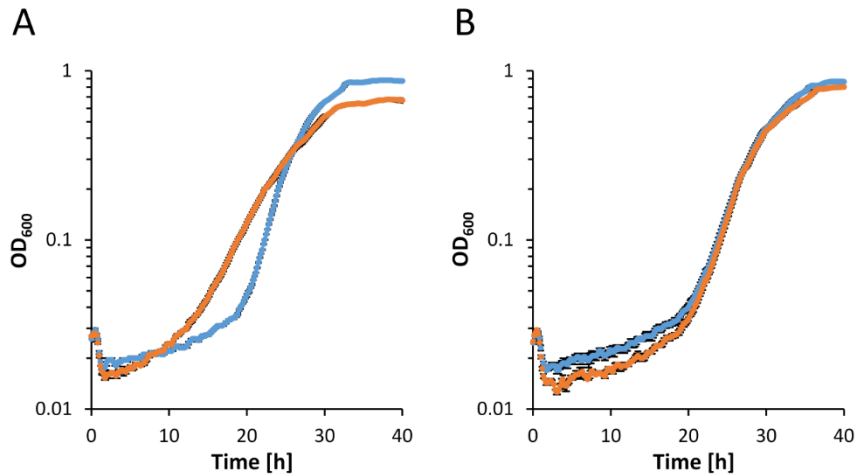

672

673

674 **Figure 2:** Growth of strains (A) KT2440\* and (B)  $\Delta pedE \Delta pedH$  in M9 minimal medium supplemented  
675 with 20 mM glycerol in the absence (blue dots) or presence of 10  $\mu M$  La<sup>3+</sup> in 96-well  
676 microtiter plates at 30°C and 250 rpm. Data represent average of biological triplicates with  
677 corresponding standard deviation.

678



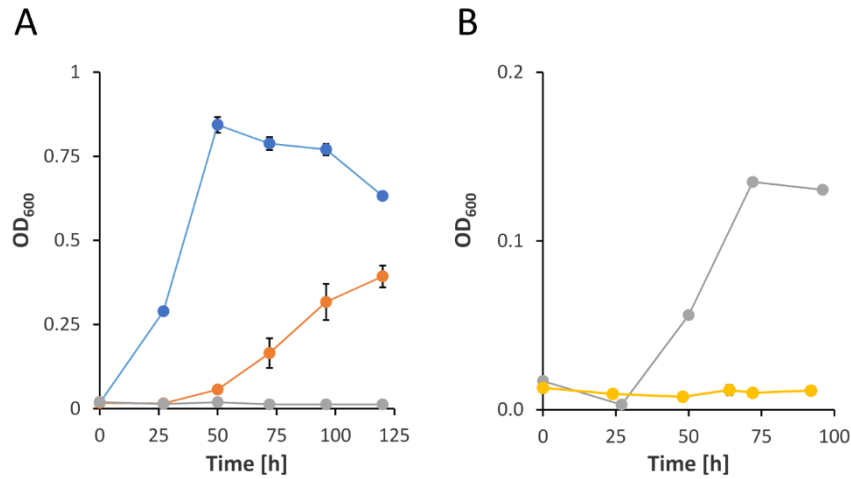

689  
690

691 **Figure 4:** (A) Growth of strains  $\Delta pedE \Delta pedH$  (blue dots),  $\Delta glpFKRD$  (orange dots), and  $\Delta pedE \Delta pedH$   
692  $\Delta glpFKRD$  (grey dots) in M9 minimal medium supplemented with 20 mM glycerol in 96-well microtiter  
693 plates. (B) Growth of strains  $\Delta pedE \Delta pedH \Delta glpFKRD$  (grey dots) and  $\Delta garK$  (yellow dots), in M9  
694 minimal medium supplemented with 20 mM DL-glycerate incubated in 96-well microtiter plates at  
695 28°C and 220 rpm. Data represent average of biological triplicates with corresponding standard  
696 deviation.

697



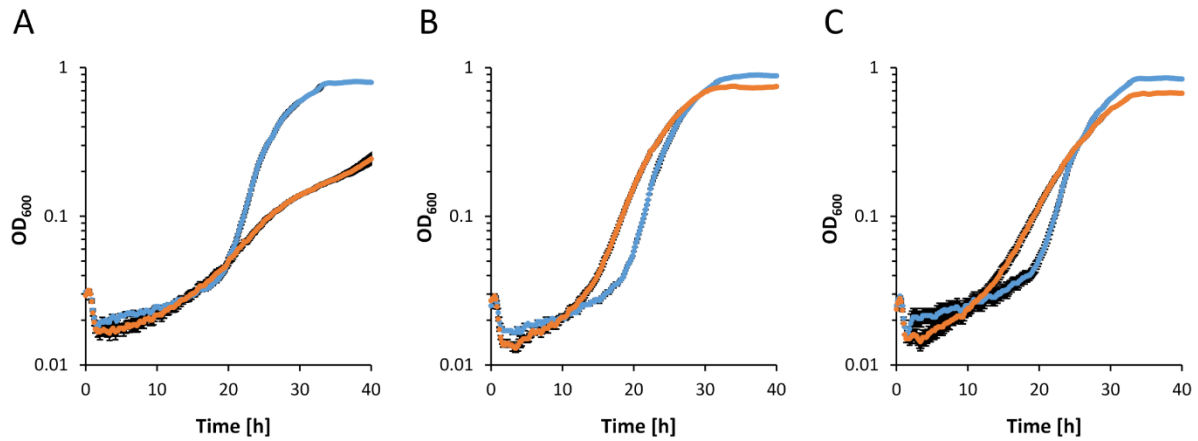

698  
699

700 **Figure 5:** Growth of strains (A)  $\Delta gark$ , (B)  $\Delta calA$ , and (C)  $\Delta glcDEF$  in M9 minimal medium supplemented  
701 with 20 mM glycerol in absence (blue dots) or presence 10  $\mu M$  La<sup>3+</sup> (orange dots) incubated in 96-well  
702 microtiter plates at 30°C and 250 rpm. Data represent average of biological triplicates with  
703 corresponding standard deviation.

704

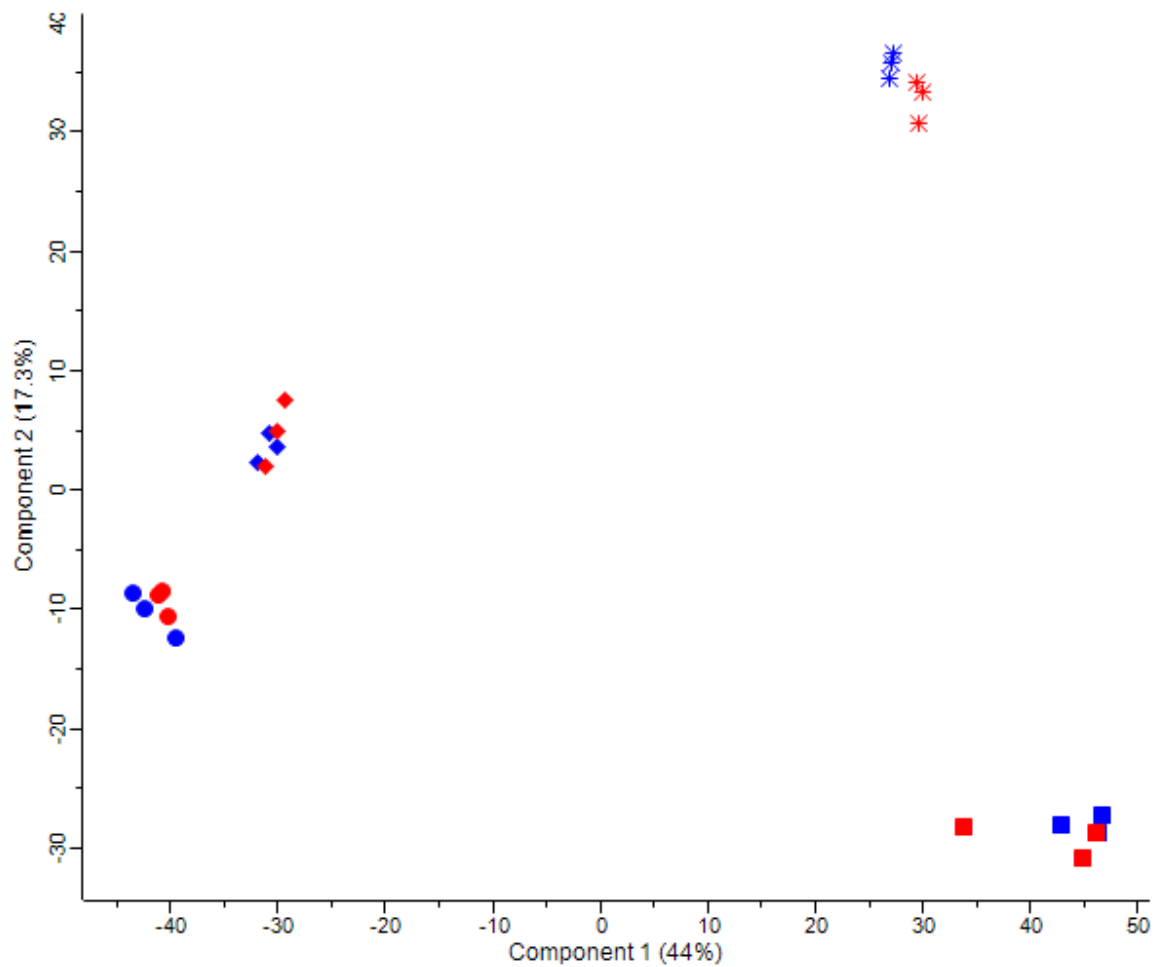

705

706 **Figure S1: PCA comparing the four different carbon sources with and without La<sup>3+</sup>.** Different carbon  
707 sources are indicated by squares (2-phenylethanol), circles (citrate), diamonds (glucose) and stars  
708 (glycerol). Samples with 10 μM La<sup>3+</sup> or without La<sup>3+</sup> in the medium are shown in blue and red,  
709 respectively. Biological replicates are indicated in the same colour. Samples can be separated  
710 according to different carbon sources while treatment with La<sup>3+</sup> only showed minor effects.
